# Supplementary material
Source: PubMed Central journal article supplement (PMC8076061)
Supplement: NIHMS1642406-supplement-Supplementary_Material.pdf [file NIHMS1642406-supplement-Supplementary_Material.pdf]

## **SUPPLEMENTARY MATERIALS**

### **Clonal relationship and directionality of progression of synchronous endometrial and ovarian carcinomas in patients with DNA mismatch repair-deficiency associated syndromes**

Moukarzel et al

Supplementary Figures S1-S3

Supplementary Table S1

## Supplementary Figure S1

LS2-CMMRD: *PMS2* p.S8fs\* (homozygous)

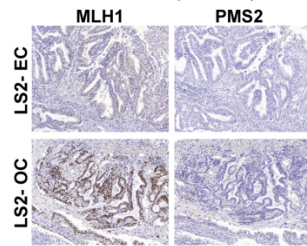

LS6: *MSH6* p.R1334P

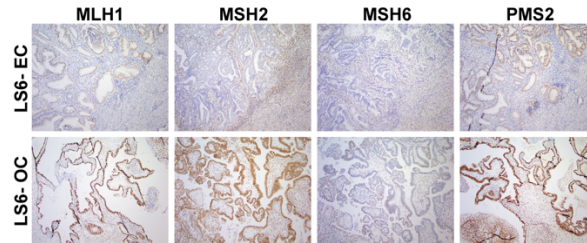

LS5: *MSH2* p.Y521\*

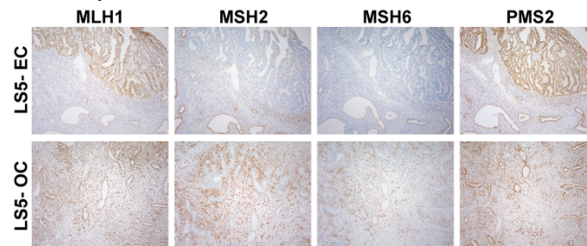

LS4: *PMS2* p.Q30\*

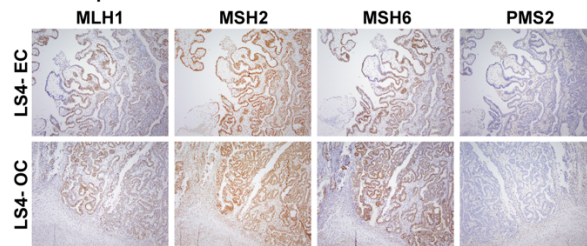

LS3: *MSH2* p.Q324FS\*

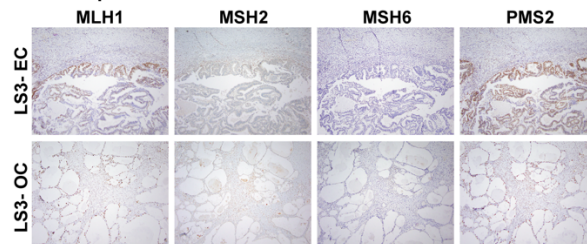

**Supplementary Figure S1: Immunohistochemical analysis of DNA mismatch repair protein expression in synchronous endometrial and ovarian cancers from patients with germline DNA mismatch repair gene mutations.**

MLH1, MSH2, MSH6 and PMS2 protein expression in the synchronous endometrial (ECs) and ovarian cancers (OCs) from patients LS2-CMMRD, LS6, LS5, LS4 and LS3 harboring germline DNA mismatch repair mutations as indicated.

## Supplementary Figure S2

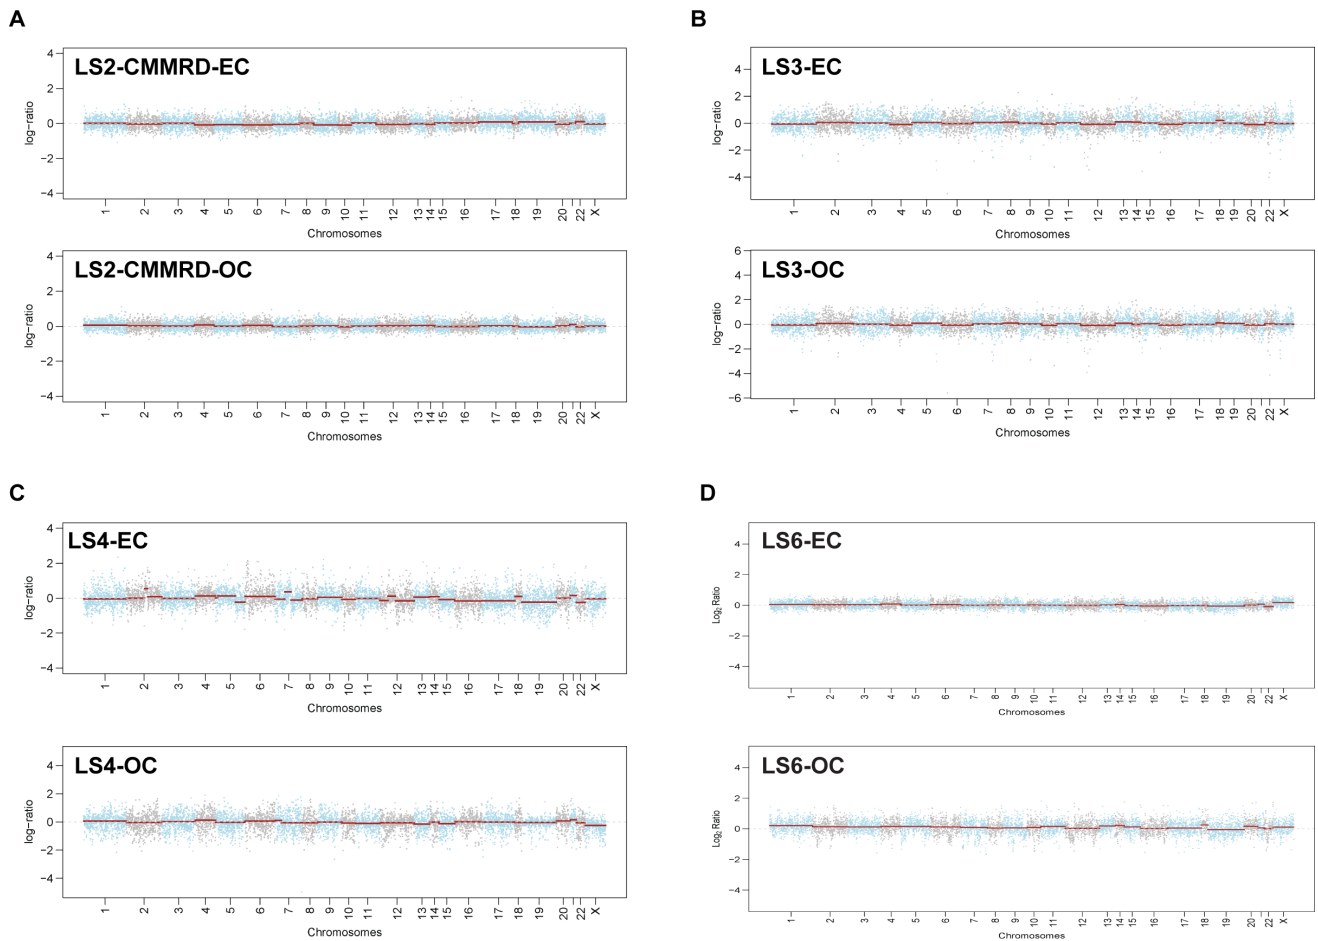

**Supplementary Figure 2: Chromosome plots of synchronous endometrial and ovarian cancers from patients with germline DNA mismatch repair mutations.** Log<sub>2</sub>-ratios are plotted on the y-axis and the genomic positions are plotted on the x-axis for the synchronous endometrial cancer (EC) and ovarian cancer (OC) cases (A) LS2-CMMRD, (B) LS3, (C) LS4 and (D) LS6.

## Supplementary Figure S3

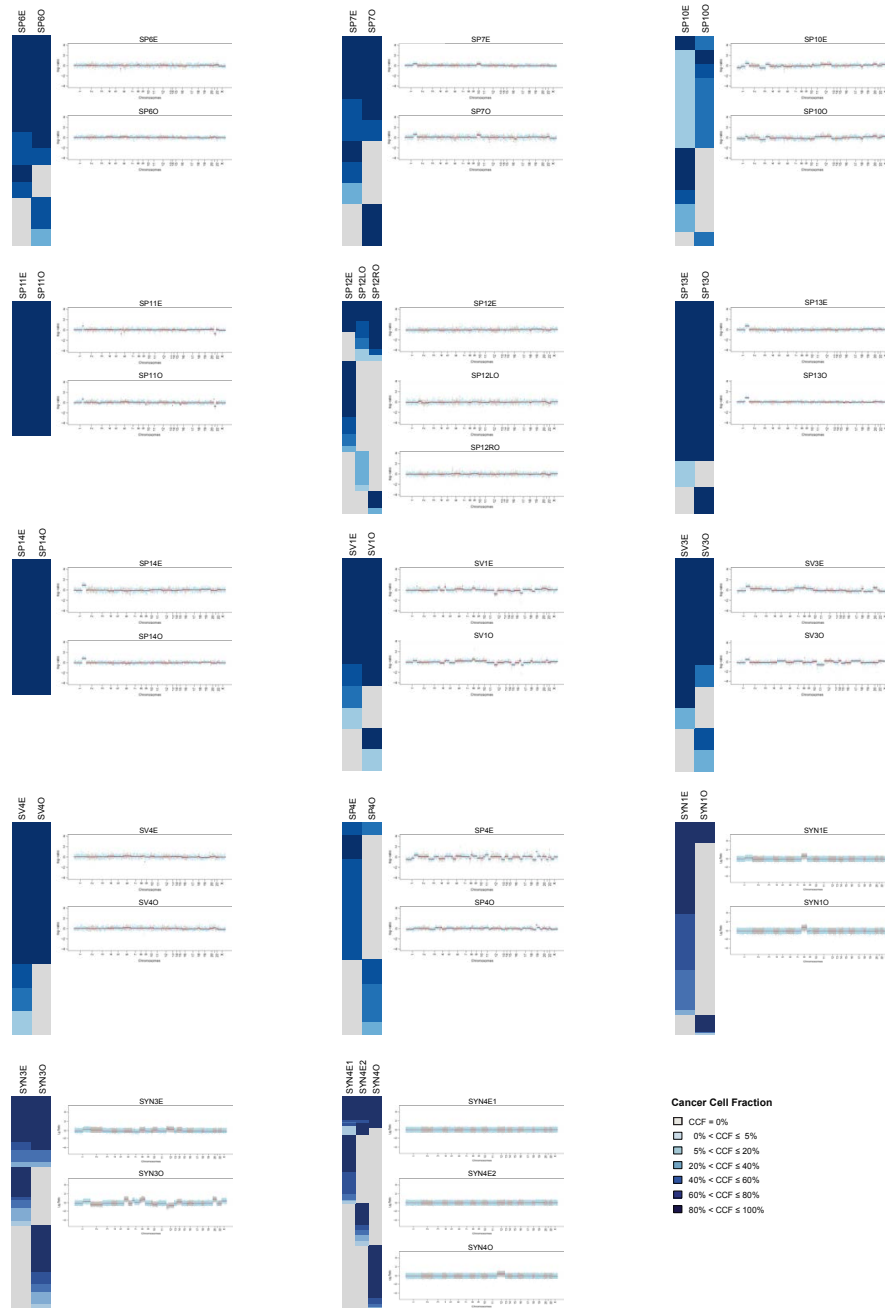

### Supplementary Figure S3: Clonal composition analysis of sporadic synchronous endometrioid endometrial and endometrioid ovarian cancers.

Re-analysis of sporadic synchronous endometrial (ECs) and ovarian cancers (OCs) (from Schultheis et al, JNCI 2016) subjected to whole-exome sequencing (SYN1, SYN3, SYN4) or targeted MSK-IMPACT sequencing (SP6, SP7, SP10, SP11, SV12, SP13, SP14, SV1, SV3, SV4, SP4). ECs and OCs of a given cases were clonally related, however for these cases, chronology of development could not be inferred based on clonal composition analysis. For each case, cancer cell fractions of somatic mutations identified in the EC and synchronous OC (left), color coded according to the legend, and copy number plots with the  $\text{Log}_2$ -ratios on the y-axis and the genomic positions on the x-axis are depicted.



| Gene   | Accession   | Length (bp) | GC (%) | GC3 (%) | GC4 (%) | GC5 (%) | GC6 (%) | GC7 (%) | GC8 (%) | GC9 (%) | GC10 (%) | GC11 (%) | GC12 (%) | GC13 (%) | GC14 (%) | GC15 (%) | GC16 (%) | GC17 (%) | GC18 (%) | GC19 (%) | GC20 (%) | GC21 (%) | GC22 (%) | GC23 (%) | GC24 (%) | GC25 (%) | GC26 (%) | GC27 (%) | GC28 (%) | GC29 (%) | GC30 (%) | GC31 (%) | GC32 (%) | GC33 (%) | GC34 (%) | GC35 (%) | GC36 (%) | GC37 (%) | GC38 (%) | GC39 (%) | GC40 (%) | GC41 (%) | GC42 (%) | GC43 (%) | GC44 (%) | GC45 (%) | GC46 (%) | GC47 (%) | GC48 (%) | GC49 (%) | GC50 (%) | GC51 (%) | GC52 (%) | GC53 (%) | GC54 (%) | GC55 (%) | GC56 (%) | GC57 (%) | GC58 (%) | GC59 (%) | GC60 (%) | GC61 (%) | GC62 (%) | GC63 (%) | GC64 (%) | GC65 (%) | GC66 (%) | GC67 (%) | GC68 (%) | GC69 (%) | GC70 (%) | GC71 (%) | GC72 (%) | GC73 (%) | GC74 (%) | GC75 (%) | GC76 (%) | GC77 (%) | GC78 (%) | GC79 (%) | GC80 (%) | GC81 (%) | GC82 (%) | GC83 (%) | GC84 (%) | GC85 (%) | GC86 (%) | GC87 (%) | GC88 (%) | GC89 (%) | GC90 (%) | GC91 (%) | GC92 (%) | GC93 (%) | GC94 (%) | GC95 (%) | GC96 (%) | GC97 (%) | GC98 (%) | GC99 (%) | GC100 (%) |
|--------|-------------|-------------|--------|---------|---------|---------|---------|---------|---------|---------|----------|----------|----------|----------|----------|----------|----------|----------|----------|----------|----------|----------|----------|----------|----------|----------|----------|----------|----------|----------|----------|----------|----------|----------|----------|----------|----------|----------|----------|----------|----------|----------|----------|----------|----------|----------|----------|----------|----------|----------|----------|----------|----------|----------|----------|----------|----------|----------|----------|----------|----------|----------|----------|----------|----------|----------|----------|----------|----------|----------|----------|----------|----------|----------|----------|----------|----------|----------|----------|----------|----------|----------|----------|----------|----------|----------|----------|----------|----------|----------|----------|----------|----------|----------|----------|----------|----------|----------|----------|----------|-----------|
| Gene 1 | Accession 1 | Length 1    | GC 1   | GC3 1   | GC4 1   | GC5 1   | GC6 1   | GC7 1   | GC8 1   | GC9 1   | GC10 1   | GC11 1   | GC12 1   | GC13 1   | GC14 1   | GC15 1   | GC16 1   | GC17 1   | GC18 1   | GC19 1   | GC20 1   | GC21 1   | GC22 1   | GC23 1   | GC24 1   | GC25 1   | GC26 1   | GC27 1   | GC28 1   | GC29 1   | GC30 1   | GC31 1   | GC32 1   | GC33 1   | GC34 1   | GC35 1   | GC36 1   | GC37 1   | GC38 1   | GC39 1   | GC40 1   | GC41 1   | GC42 1   | GC43 1   | GC44 1   | GC45 1   | GC46 1   | GC47 1   | GC48 1   | GC49 1   | GC50 1   | GC51 1   | GC52 1   | GC53 1   | GC54 1   | GC55 1   | GC56 1   | GC57 1   | GC58 1   | GC59 1   | GC60 1   | GC61 1   | GC62 1   | GC63 1   | GC64 1   | GC65 1   | GC66 1   | GC67 1   | GC68 1   | GC69 1   | GC70 1   | GC71 1   | GC72 1   | GC73 1   | GC74 1   | GC75 1   | GC76 1   | GC77 1   | GC78 1   | GC79 1   | GC80 1   | GC81 1   | GC82 1   | GC83 1   | GC84 1   | GC85 1   | GC86 1   | GC87 1   | GC88 1   | GC89 1   | GC90 1   | GC91 1   | GC92 1   | GC93 1   | GC94 1   | GC95 1   | GC96 1   | GC97 1   | GC98 1   | GC99 1   | GC100 1   |
| Gene 2 | Accession 2 | Length 2    | GC 2   | GC3 2   | GC4 2   | GC5 2   | GC6 2   | GC7 2   | GC8 2   | GC9 2   | GC10 2   | GC11 2   | GC12 2   | GC13 2   | GC14 2   | GC15 2   | GC16 2   | GC17 2   | GC18 2   | GC19 2   | GC20 2   | GC21 2   | GC22 2   | GC23 2   | GC24 2   | GC25 2   | GC26 2   | GC27 2   | GC28 2   | GC29 2   | GC30 2   | GC31 2   | GC32 2   | GC33 2   | GC34 2   | GC35 2   | GC36 2   | GC37 2   | GC38 2   | GC39 2   | GC40 2   | GC41 2   | GC42 2   | GC43 2   | GC44 2   | GC45 2   | GC46 2   | GC47 2   | GC48 2   | GC49 2   | GC50 2   | GC51 2   | GC52 2   | GC53 2   | GC54 2   | GC55 2   | GC56 2   | GC57 2   | GC58 2   | GC59 2   | GC60 2   | GC61 2   | GC62 2   | GC63 2   | GC64 2   | GC65 2   | GC66 2   | GC67 2   | GC68 2   | GC69 2   | GC70 2   | GC71 2   | GC72 2   | GC73 2   | GC74 2   | GC75 2   | GC76 2   | GC77 2   | GC78 2   | GC79 2   | GC80 2   | GC81 2   | GC82 2   | GC83 2   | GC84 2   | GC85 2   | GC86 2   | GC87 2   | GC88 2   | GC89 2   | GC90 2   | GC91 2   | GC92 2   | GC93 2   | GC94 2   | GC95 2   | GC96 2   | GC97 2   | GC98 2   | GC99 2   | GC100 2   |
| Gene 3 | Accession 3 | Length 3    | GC 3   | GC3 3   | GC4 3   | GC5 3   | GC6 3   | GC7 3   | GC8 3   | GC9 3   | GC10 3   | GC11 3   | GC12 3   | GC13 3   | GC14 3   | GC15 3   | GC16 3   | GC17 3   | GC18 3   | GC19 3   | GC20 3   | GC21 3   | GC22 3   | GC23 3   | GC24 3   | GC25 3   | GC26 3   | GC27 3   | GC28 3   | GC29 3   | GC30 3   | GC31 3   | GC32 3   | GC33 3   | GC34 3   | GC35 3   | GC36 3   | GC37 3   | GC38 3   | GC39 3   | GC40 3   | GC41 3   | GC42 3   | GC43 3   | GC44 3   | GC45 3   | GC46 3   | GC47 3   | GC48 3   | GC49 3   | GC50 3   | GC51 3   | GC52 3   | GC53 3   | GC54 3   | GC55 3   | GC56 3   | GC57 3   | GC58 3   | GC59 3   | GC60 3   | GC61 3   | GC62 3   | GC63 3   | GC64 3   | GC65 3   | GC66 3   | GC67 3   | GC68 3   | GC69 3   | GC70 3   | GC71 3   | GC72 3   | GC73 3   | GC74 3   | GC75 3   | GC76 3   | GC77 3   | GC78 3   | GC79 3   | GC80 3   | GC81 3   | GC82 3   | GC83 3   | GC84 3   | GC85 3   | GC86 3   | GC87 3   | GC88 3   | GC89 3   | GC90 3   | GC91 3   | GC92 3   | GC93 3   | GC94 3   | GC95 3   | GC96 3   | GC97 3   | GC98 3   | GC99 3   | GC100 3   |
| Gene 4 | Accession 4 | Length 4    | GC 4   | GC3 4   | GC4 4   | GC5 4   | GC6 4   | GC7 4   | GC8 4   | GC9 4   | GC10 4   | GC11 4   | GC12 4   | GC13 4   | GC14 4   | GC15 4   | GC16 4   | GC17 4   | GC18 4   | GC19 4   | GC20 4   | GC21 4   | GC22 4   | GC23 4   | GC24 4   | GC25 4   | GC26 4   | GC27 4   | GC28 4   | GC29 4   | GC30 4   | GC31 4   | GC32 4   | GC33 4   | GC34 4   | GC35 4   | GC36 4   | GC37 4   | GC38 4   | GC39 4   | GC40 4   | GC41 4   | GC42 4   | GC43 4   | GC44 4   | GC45 4   | GC46 4   | GC47 4   | GC48 4   | GC49 4   | GC50 4   | GC51 4   | GC52 4   | GC53 4   | GC54 4   | GC55 4   | GC56 4   | GC57 4   | GC58 4   | GC59 4   | GC60 4   | GC61 4   | GC62 4   | GC63 4   | GC64 4   | GC65 4   | GC66 4   | GC67 4   | GC68 4   | GC69 4   | GC70 4   | GC71 4   | GC72 4   | GC73 4   | GC74 4   | GC75 4   | GC76 4   | GC77 4   | GC78 4   | GC79 4   | GC80 4   | GC81 4   | GC82 4   | GC83 4   | GC84 4   | GC85 4   | GC86 4   | GC87 4   | GC88 4   | GC89 4   | GC90 4   | GC91 4   | GC92 4   | GC93 4   | GC94 4   | GC95 4   | GC96 4   | GC97 4   | GC98 4   | GC99 4   | GC100 4   |
| Gene 5 | Accession 5 | Length 5    | GC 5   | GC3 5   | GC4 5   | GC5 5   | GC6 5   | GC7 5   | GC8 5   | GC9 5   | GC10 5   | GC11 5   | GC12 5   | GC13 5   | GC14 5   | GC15 5   | GC16 5   | GC17 5   | GC18 5   | GC19 5   | GC20 5   | GC21 5   | GC22 5   | GC23 5   | GC24 5   | GC25 5   | GC26 5   | GC27 5   | GC28 5   | GC29 5   | GC30 5   | GC31 5   | GC32 5   | GC33 5   | GC34 5   | GC35 5   | GC36 5   | GC37 5   | GC38 5   | GC39 5   | GC40 5   | GC41 5   | GC42 5   | GC43 5   | GC44 5   | GC45 5   | GC46 5   | GC47 5   | GC48 5   | GC49 5   | GC50 5   | GC51 5   | GC52 5   | GC53 5   | GC54 5   | GC55 5   | GC56 5   | GC57 5   | GC58 5   | GC59 5   | GC60 5   | GC61 5   | GC62 5   | GC63 5   | GC64 5   | GC65 5   | GC66 5   | GC67 5   | GC68 5   | GC69 5   | GC70 5   | GC71 5   | GC72 5   | GC73 5   | GC74 5   | GC75 5   | GC76 5   | GC77 5   | GC78 5   | GC79 5   | GC80 5   | GC81 5   | GC82 5   | GC83 5   | GC84 5   | GC85 5   | GC86 5   | GC87 5   | GC88 5   | GC89 5   | GC90 5   | GC91 5   | GC92 5   | GC93 5   | GC94 5   | GC95 5   | GC96 5   | GC97 5   | GC98 5   | GC99 5   | GC100 5   |

| Gene  | Accession  | Length (bp) | GC (%) | GC3 (%) | GC4 (%) | GC5 (%) | GC6 (%) | GC7 (%) | GC8 (%) | GC9 (%) | GC10 (%) | GC11 (%) | GC12 (%) | GC13 (%) | GC14 (%) | GC15 (%) | GC16 (%) | GC17 (%) | GC18 (%) | GC19 (%) | GC20 (%) | GC21 (%) | GC22 (%) | GC23 (%) | GC24 (%) | GC25 (%) | GC26 (%) | GC27 (%) | GC28 (%) | GC29 (%) | GC30 (%) | GC31 (%) | GC32 (%) | GC33 (%) | GC34 (%) | GC35 (%) | GC36 (%) | GC37 (%) | GC38 (%) | GC39 (%) | GC40 (%) | GC41 (%) | GC42 (%) | GC43 (%) | GC44 (%) | GC45 (%) | GC46 (%) | GC47 (%) | GC48 (%) | GC49 (%) | GC50 (%) | GC51 (%) | GC52 (%) | GC53 (%) | GC54 (%) | GC55 (%) | GC56 (%) | GC57 (%) | GC58 (%) | GC59 (%) | GC60 (%) | GC61 (%) | GC62 (%) | GC63 (%) | GC64 (%) | GC65 (%) | GC66 (%) | GC67 (%) | GC68 (%) | GC69 (%) | GC70 (%) | GC71 (%) | GC72 (%) | GC73 (%) | GC74 (%) | GC75 (%) | GC76 (%) | GC77 (%) | GC78 (%) | GC79 (%) | GC80 (%) | GC81 (%) | GC82 (%) | GC83 (%) | GC84 (%) | GC85 (%) | GC86 (%) | GC87 (%) | GC88 (%) | GC89 (%) | GC90 (%) | GC91 (%) | GC92 (%) | GC93 (%) | GC94 (%) | GC95 (%) | GC96 (%) | GC97 (%) | GC98 (%) | GC99 (%) | GC100 (%) |
|-------|------------|-------------|--------|---------|---------|---------|---------|---------|---------|---------|----------|----------|----------|----------|----------|----------|----------|----------|----------|----------|----------|----------|----------|----------|----------|----------|----------|----------|----------|----------|----------|----------|----------|----------|----------|----------|----------|----------|----------|----------|----------|----------|----------|----------|----------|----------|----------|----------|----------|----------|----------|----------|----------|----------|----------|----------|----------|----------|----------|----------|----------|----------|----------|----------|----------|----------|----------|----------|----------|----------|----------|----------|----------|----------|----------|----------|----------|----------|----------|----------|----------|----------|----------|----------|----------|----------|----------|----------|----------|----------|----------|----------|----------|----------|----------|----------|----------|----------|----------|----------|-----------|
| Gene1 | Accession1 | Length1     | GC1    | GC31    | GC41    | GC51    | GC61    | GC71    | GC81    | GC91    | GC101    | GC111    | GC121    | GC131    | GC141    | GC151    | GC161    | GC171    | GC181    | GC191    | GC201    | GC211    | GC221    | GC231    | GC241    | GC251    | GC261    | GC271    | GC281    | GC291    | GC301    | GC311    | GC321    | GC331    | GC341    | GC351    | GC361    | GC371    | GC381    | GC391    | GC401    | GC411    | GC421    | GC431    | GC441    | GC451    | GC461    | GC471    | GC481    | GC491    | GC501    | GC511    | GC521    | GC531    | GC541    | GC551    | GC561    | GC571    | GC581    | GC591    | GC601    | GC611    | GC621    | GC631    | GC641    | GC651    | GC661    | GC671    | GC681    | GC691    | GC701    | GC711    | GC721    | GC731    | GC741    | GC751    | GC761    | GC771    | GC781    | GC791    | GC801    | GC811    | GC821    | GC831    | GC841    | GC851    | GC861    | GC871    | GC881    | GC891    | GC901    | GC911    | GC921    | GC931    | GC941    | GC951    | GC961    | GC971    | GC981    | GC991    | GC1001    |
| Gene2 | Accession2 | Length2     | GC2    | GC32    | GC42    | GC52    | GC62    | GC72    | GC82    | GC92    | GC102    | GC112    | GC122    | GC132    | GC142    | GC152    | GC162    | GC172    | GC182    | GC192    | GC202    | GC212    | GC222    | GC232    | GC242    | GC252    | GC262    | GC272    | GC282    | GC292    | GC302    | GC312    | GC322    | GC332    | GC342    | GC352    | GC362    | GC372    | GC382    | GC392    | GC402    | GC412    | GC422    | GC432    | GC442    | GC452    | GC462    | GC472    | GC482    | GC492    | GC502    | GC512    | GC522    | GC532    | GC542    | GC552    | GC562    | GC572    | GC582    | GC592    | GC602    | GC612    | GC622    | GC632    | GC642    | GC652    | GC662    | GC672    | GC682    | GC692    | GC702    | GC712    | GC722    | GC732    | GC742    | GC752    | GC762    | GC772    | GC782    | GC792    | GC802    | GC812    | GC822    | GC832    | GC842    | GC852    | GC862    | GC872    | GC882    | GC892    | GC902    | GC912    | GC922    | GC932    | GC942    | GC952    | GC962    | GC972    | GC982    | GC992    | GC1002    |
| Gene3 | Accession3 | Length3     | GC3    | GC33    | GC43    | GC53    | GC63    | GC73    | GC83    | GC93    | GC103    | GC113    | GC123    | GC133    | GC143    | GC153    | GC163    | GC173    | GC183    | GC193    | GC203    | GC213    | GC223    | GC233    | GC243    | GC253    | GC263    | GC273    | GC283    | GC293    | GC303    | GC313    | GC323    | GC333    | GC343    | GC353    | GC363    | GC373    | GC383    | GC393    | GC403    | GC413    | GC423    | GC433    | GC443    | GC453    | GC463    | GC473    | GC483    | GC493    | GC503    | GC513    | GC523    | GC533    | GC543    | GC553    | GC563    | GC573    | GC583    | GC593    | GC603    | GC613    | GC623    | GC633    | GC643    | GC653    | GC663    | GC673    | GC683    | GC693    | GC703    | GC713    | GC723    | GC733    | GC743    | GC753    | GC763    | GC773    | GC783    | GC793    | GC803    | GC813    | GC823    | GC833    | GC843    | GC853    | GC863    | GC873    | GC883    | GC893    | GC903    | GC913    | GC923    | GC933    | GC943    | GC953    | GC963    | GC973    | GC983    | GC993    | GC1003    |
| Gene4 | Accession4 | Length4     | GC4    | GC34    | GC44    | GC54    | GC64    | GC74    | GC84    | GC94    | GC104    | GC114    | GC124    | GC134    | GC144    | GC154    | GC164    | GC174    | GC184    | GC194    | GC204    | GC214    | GC224    | GC234    | GC244    | GC254    | GC264    | GC274    | GC284    | GC294    | GC304    | GC314    | GC324    | GC334    | GC344    | GC354    | GC364    | GC374    | GC384    | GC394    | GC404    | GC414    | GC424    | GC434    | GC444    | GC454    | GC464    | GC474    | GC484    | GC494    | GC504    | GC514    | GC524    | GC534    | GC544    | GC554    | GC564    | GC574    | GC584    | GC594    | GC604    | GC614    | GC624    | GC634    | GC644    | GC654    | GC664    | GC674    | GC684    | GC694    | GC704    | GC714    | GC724    | GC734    | GC744    | GC754    | GC764    | GC774    | GC784    | GC794    | GC804    | GC814    | GC824    | GC834    | GC844    | GC854    | GC864    | GC874    | GC884    | GC894    | GC904    | GC914    | GC924    | GC934    | GC944    | GC954    | GC964    | GC974    | GC984    | GC994    | GC1004    |
| Gene5 | Accession5 | Length5     | GC5    | GC35    | GC45    | GC55    | GC65    | GC75    | GC85    | GC95    | GC105    | GC115    | GC125    | GC135    | GC145    | GC155    | GC165    | GC175    | GC185    | GC195    | GC205    | GC215    | GC225    | GC235    | GC245    | GC255    | GC265    | GC275    | GC285    | GC295    | GC305    | GC315    | GC325    | GC335    | GC345    | GC355    | GC365    | GC375    | GC385    | GC395    | GC405    | GC415    | GC425    | GC435    | GC445    | GC455    | GC465    | GC475    | GC485    | GC495    | GC505    | GC515    | GC525    | GC535    | GC545    | GC555    | GC565    | GC575    | GC585    | GC595    | GC605    | GC615    | GC625    | GC635    | GC645    | GC655    | GC665    | GC675    | GC685    | GC695    | GC705    | GC715    | GC725    | GC735    | GC745    | GC755    | GC765    | GC775    | GC785    | GC795    | GC805    | GC815    | GC825    | GC835    | GC845    | GC855    | GC865    | GC875    | GC885    | GC895    | GC905    | GC915    | GC925    | GC935    | GC945    | GC955    | GC965    | GC975    | GC985    | GC995    | GC1005    |

| Gene   | Accession   | Length (bp) | GC (%) | GC3 (%) | GC4 (%) | GC5 (%) | GC6 (%) | GC7 (%) | GC8 (%) | GC9 (%) | GC10 (%) | GC11 (%) | GC12 (%) | GC13 (%) | GC14 (%) | GC15 (%) | GC16 (%) | GC17 (%) | GC18 (%) | GC19 (%) | GC20 (%) | GC21 (%) | GC22 (%) | GC23 (%) | GC24 (%) | GC25 (%) | GC26 (%) | GC27 (%) | GC28 (%) | GC29 (%) | GC30 (%) | GC31 (%) | GC32 (%) | GC33 (%) | GC34 (%) | GC35 (%) | GC36 (%) | GC37 (%) | GC38 (%) | GC39 (%) | GC40 (%) | GC41 (%) | GC42 (%) | GC43 (%) | GC44 (%) | GC45 (%) | GC46 (%) | GC47 (%) | GC48 (%) | GC49 (%) | GC50 (%) | GC51 (%) | GC52 (%) | GC53 (%) | GC54 (%) | GC55 (%) | GC56 (%) | GC57 (%) | GC58 (%) | GC59 (%) | GC60 (%) | GC61 (%) | GC62 (%) | GC63 (%) | GC64 (%) | GC65 (%) | GC66 (%) | GC67 (%) | GC68 (%) | GC69 (%) | GC70 (%) | GC71 (%) | GC72 (%) | GC73 (%) | GC74 (%) | GC75 (%) | GC76 (%) | GC77 (%) | GC78 (%) | GC79 (%) | GC80 (%) | GC81 (%) | GC82 (%) | GC83 (%) | GC84 (%) | GC85 (%) | GC86 (%) | GC87 (%) | GC88 (%) | GC89 (%) | GC90 (%) | GC91 (%) | GC92 (%) | GC93 (%) | GC94 (%) | GC95 (%) | GC96 (%) | GC97 (%) | GC98 (%) | GC99 (%) | GC100 (%) |
|--------|-------------|-------------|--------|---------|---------|---------|---------|---------|---------|---------|----------|----------|----------|----------|----------|----------|----------|----------|----------|----------|----------|----------|----------|----------|----------|----------|----------|----------|----------|----------|----------|----------|----------|----------|----------|----------|----------|----------|----------|----------|----------|----------|----------|----------|----------|----------|----------|----------|----------|----------|----------|----------|----------|----------|----------|----------|----------|----------|----------|----------|----------|----------|----------|----------|----------|----------|----------|----------|----------|----------|----------|----------|----------|----------|----------|----------|----------|----------|----------|----------|----------|----------|----------|----------|----------|----------|----------|----------|----------|----------|----------|----------|----------|----------|----------|----------|----------|----------|----------|----------|-----------|
| Gene 1 | Accession 1 | Length 1    | GC 1   | GC3 1   | GC4 1   | GC5 1   | GC6 1   | GC7 1   | GC8 1   | GC9 1   | GC10 1   | GC11 1   | GC12 1   | GC13 1   | GC14 1   | GC15 1   | GC16 1   | GC17 1   | GC18 1   | GC19 1   | GC20 1   | GC21 1   | GC22 1   | GC23 1   | GC24 1   | GC25 1   | GC26 1   | GC27 1   | GC28 1   | GC29 1   | GC30 1   | GC31 1   | GC32 1   | GC33 1   | GC34 1   | GC35 1   | GC36 1   | GC37 1   | GC38 1   | GC39 1   | GC40 1   | GC41 1   | GC42 1   | GC43 1   | GC44 1   | GC45 1   | GC46 1   | GC47 1   | GC48 1   | GC49 1   | GC50 1   | GC51 1   | GC52 1   | GC53 1   | GC54 1   | GC55 1   | GC56 1   | GC57 1   | GC58 1   | GC59 1   | GC60 1   | GC61 1   | GC62 1   | GC63 1   | GC64 1   | GC65 1   | GC66 1   | GC67 1   | GC68 1   | GC69 1   | GC70 1   | GC71 1   | GC72 1   | GC73 1   | GC74 1   | GC75 1   | GC76 1   | GC77 1   | GC78 1   | GC79 1   | GC80 1   | GC81 1   | GC82 1   | GC83 1   | GC84 1   | GC85 1   | GC86 1   | GC87 1   | GC88 1   | GC89 1   | GC90 1   | GC91 1   | GC92 1   | GC93 1   | GC94 1   | GC95 1   | GC96 1   | GC97 1   | GC98 1   | GC99 1   | GC100 1   |
| Gene 2 | Accession 2 | Length 2    | GC 2   | GC3 2   | GC4 2   | GC5 2   | GC6 2   | GC7 2   | GC8 2   | GC9 2   | GC10 2   | GC11 2   | GC12 2   | GC13 2   | GC14 2   | GC15 2   | GC16 2   | GC17 2   | GC18 2   | GC19 2   | GC20 2   | GC21 2   | GC22 2   | GC23 2   | GC24 2   | GC25 2   | GC26 2   | GC27 2   | GC28 2   | GC29 2   | GC30 2   | GC31 2   | GC32 2   | GC33 2   | GC34 2   | GC35 2   | GC36 2   | GC37 2   | GC38 2   | GC39 2   | GC40 2   | GC41 2   | GC42 2   | GC43 2   | GC44 2   | GC45 2   | GC46 2   | GC47 2   | GC48 2   | GC49 2   | GC50 2   | GC51 2   | GC52 2   | GC53 2   | GC54 2   | GC55 2   | GC56 2   | GC57 2   | GC58 2   | GC59 2   | GC60 2   | GC61 2   | GC62 2   | GC63 2   | GC64 2   | GC65 2   | GC66 2   | GC67 2   | GC68 2   | GC69 2   | GC70 2   | GC71 2   | GC72 2   | GC73 2   | GC74 2   | GC75 2   | GC76 2   | GC77 2   | GC78 2   | GC79 2   | GC80 2   | GC81 2   | GC82 2   | GC83 2   | GC84 2   | GC85 2   | GC86 2   | GC87 2   | GC88 2   | GC89 2   | GC90 2   | GC91 2   | GC92 2   | GC93 2   | GC94 2   | GC95 2   | GC96 2   | GC97 2   | GC98 2   | GC99 2   | GC100 2   |
| Gene 3 | Accession 3 | Length 3    | GC 3   | GC3 3   | GC4 3   | GC5 3   | GC6 3   | GC7 3   | GC8 3   | GC9 3   | GC10 3   | GC11 3   | GC12 3   | GC13 3   | GC14 3   | GC15 3   | GC16 3   | GC17 3   | GC18 3   | GC19 3   | GC20 3   | GC21 3   | GC22 3   | GC23 3   | GC24 3   | GC25 3   | GC26 3   | GC27 3   | GC28 3   | GC29 3   | GC30 3   | GC31 3   | GC32 3   | GC33 3   | GC34 3   | GC35 3   | GC36 3   | GC37 3   | GC38 3   | GC39 3   | GC40 3   | GC41 3   | GC42 3   | GC43 3   | GC44 3   | GC45 3   | GC46 3   | GC47 3   | GC48 3   | GC49 3   | GC50 3   | GC51 3   | GC52 3   | GC53 3   | GC54 3   | GC55 3   | GC56 3   | GC57 3   | GC58 3   | GC59 3   | GC60 3   | GC61 3   | GC62 3   | GC63 3   | GC64 3   | GC65 3   | GC66 3   | GC67 3   | GC68 3   | GC69 3   | GC70 3   | GC71 3   | GC72 3   | GC73 3   | GC74 3   | GC75 3   | GC76 3   | GC77 3   | GC78 3   | GC79 3   | GC80 3   | GC81 3   | GC82 3   | GC83 3   | GC84 3   | GC85 3   | GC86 3   | GC87 3   | GC88 3   | GC89 3   | GC90 3   | GC91 3   | GC92 3   | GC93 3   | GC94 3   | GC95 3   | GC96 3   | GC97 3   | GC98 3   | GC99 3   | GC100 3   |
| Gene 4 | Accession 4 | Length 4    | GC 4   | GC3 4   | GC4 4   | GC5 4   | GC6 4   | GC7 4   | GC8 4   | GC9 4   | GC10 4   | GC11 4   | GC12 4   | GC13 4   | GC14 4   | GC15 4   | GC16 4   | GC17 4   | GC18 4   | GC19 4   | GC20 4   | GC21 4   | GC22 4   | GC23 4   | GC24 4   | GC25 4   | GC26 4   | GC27 4   | GC28 4   | GC29 4   | GC30 4   | GC31 4   | GC32 4   | GC33 4   | GC34 4   | GC35 4   | GC36 4   | GC37 4   | GC38 4   | GC39 4   | GC40 4   | GC41 4   | GC42 4   | GC43 4   | GC44 4   | GC45 4   | GC46 4   | GC47 4   | GC48 4   | GC49 4   | GC50 4   | GC51 4   | GC52 4   | GC53 4   | GC54 4   | GC55 4   | GC56 4   | GC57 4   | GC58 4   | GC59 4   | GC60 4   | GC61 4   | GC62 4   | GC63 4   | GC64 4   | GC65 4   | GC66 4   | GC67 4   | GC68 4   | GC69 4   | GC70 4   | GC71 4   | GC72 4   | GC73 4   | GC74 4   | GC75 4   | GC76 4   | GC77 4   | GC78 4   | GC79 4   | GC80 4   | GC81 4   | GC82 4   | GC83 4   | GC84 4   | GC85 4   | GC86 4   | GC87 4   | GC88 4   | GC89 4   | GC90 4   | GC91 4   | GC92 4   | GC93 4   | GC94 4   | GC95 4   | GC96 4   | GC97 4   | GC98 4   | GC99 4   | GC100 4   |
| Gene 5 | Accession 5 | Length 5    | GC 5   | GC3 5   | GC4 5   | GC5 5   | GC6 5   | GC7 5   | GC8 5   | GC9 5   | GC10 5   | GC11 5   | GC12 5   | GC13 5   | GC14 5   | GC15 5   | GC16 5   | GC17 5   | GC18 5   | GC19 5   | GC20 5   | GC21 5   | GC22 5   | GC23 5   | GC24 5   | GC25 5   | GC26 5   | GC27 5   | GC28 5   | GC29 5   | GC30 5   | GC31 5   | GC32 5   | GC33 5   | GC34 5   | GC35 5   | GC36 5   | GC37 5   | GC38 5   | GC39 5   | GC40 5   | GC41 5   | GC42 5   | GC43 5   | GC44 5   | GC45 5   | GC46 5   | GC47 5   | GC48 5   | GC49 5   | GC50 5   | GC51 5   | GC52 5   | GC53 5   | GC54 5   | GC55 5   | GC56 5   | GC57 5   | GC58 5   | GC59 5   | GC60 5   | GC61 5   | GC62 5   | GC63 5   | GC64 5   | GC65 5   | GC66 5   | GC67 5   | GC68 5   | GC69 5   | GC70 5   | GC71 5   | GC72 5   | GC73 5   | GC74 5   | GC75 5   | GC76 5   | GC77 5   | GC78 5   | GC79 5   | GC80 5   | GC81 5   | GC82 5   | GC83 5   | GC84 5   | GC85 5   | GC86 5   | GC87 5   | GC88 5   | GC89 5   | GC90 5   | GC91 5   | GC92 5   | GC93 5   | GC94 5   | GC95 5   | GC96 5   | GC97 5   | GC98 5   | GC99 5   | GC100 5   |
